# Supplementary material for: Attitudes of Black American Christian church leaders toward Opioid Use Disorder, overdoses, and harm reduction: a qualitative study
Source: PubMed Central journal article supplement (PMC11021723; doi:10.3389/fpsyt.2024.1359826), 2024-04-03
Supplement: Table_2.pdf [file Table_2.pdf]

**SUPPLEMENT 2**

**Thematic codes and subcodes grouped by categories, illustrating attitude toward Opioid Use Disorder and Harm Reduction, from interviews with Black Rhode Island clergy, October 2021-January 2022**

| <b>CODES</b>                             | <b>Subcodes</b>                                                                                                                                                                                                                                                                                                                                                                                                                        |
|------------------------------------------|----------------------------------------------------------------------------------------------------------------------------------------------------------------------------------------------------------------------------------------------------------------------------------------------------------------------------------------------------------------------------------------------------------------------------------------|
| AWARENESS OF OPIOID USE DISORDER (OUD)   | <ul style="list-style-type: none"> <li>▪ Chasing next high</li> <li>▪ Awareness of fentanyl (10 church leaders)</li> <li>▪ Why the increase in opioid deaths among Blacks</li> <li>▪ OUD is also a disease</li> <li>▪ History of opioid addiction</li> <li>▪ OUD is not a willful occurrence</li> <li>▪ Addiction transcends the physical realm</li> </ul>                                                                             |
| OUD STORIES                              | <ul style="list-style-type: none"> <li>▪ Congregants OUD stories</li> <li>▪ Difficult to recover from addiction</li> <li>▪ Miraculous healing from OUD</li> <li>▪ Personal addiction stories</li> <li>▪ Methadone clinic recounts</li> </ul>                                                                                                                                                                                           |
| HARM REDUCTION                           | <ul style="list-style-type: none"> <li>▪ Understanding of harm reduction</li> <li>▪ Inner Value Conflicts</li> <li>▪ In favor</li> <li>▪ Harm reduction center views</li> <li>▪ Not in favor</li> </ul>                                                                                                                                                                                                                                |
| WHY SOME BLACK AMERICANS DO NOT TAKE OUD | <ul style="list-style-type: none"> <li>▪ Inconvenience of frequent clinic visits</li> <li>▪ Misinformation</li> <li>▪ Mistrust of the system</li> <li>▪ Limited access to primary care</li> <li>▪ Culturally insensitive environment</li> <li>▪ Physiological and pharmacological challenges</li> </ul>                                                                                                                                |
| RISK FACTORS FOR OUD                     | <ul style="list-style-type: none"> <li>▪ Hopelessness and disappointment</li> <li>▪ Low socioeconomic status</li> <li>▪ Poor home environment</li> <li>▪ Poor home environment</li> <li>▪ Poor choices</li> <li>▪ Behavioral health challenges</li> <li>▪ Disparities in Black communities</li> <li>▪ Genetics and environmental</li> <li>▪ Anybody is fair game</li> <li>▪ Male gender</li> <li>▪ Spiritual or evil attack</li> </ul> |
| PROTECTIVE FACTORS FOR OUD               | <ul style="list-style-type: none"> <li>▪ Christian teachings and values</li> <li>▪ Learning from negative examples</li> <li>▪ Having resilience</li> <li>▪ Higher socioeconomic status</li> <li>▪ Strong support system</li> </ul>                                                                                                                                                                                                     |
| CHURCH INTERVENTION COMPONENTS           | <ul style="list-style-type: none"> <li>▪ Church-affiliated OUD recovery ministries</li> <li>▪ Education and resources</li> <li>▪ Church and agency collaborations</li> </ul>                                                                                                                                                                                                                                                           |

**SUPPLEMENT 2**

**Thematic codes and subcodes grouped by categories, illustrating attitude toward Opioid Use Disorder and Harm Reduction, from interviews with Black Rhode Island clergy, October 2021-January 2022**

|  |                                                                                                                                       |
|--|---------------------------------------------------------------------------------------------------------------------------------------|
|  | <ul style="list-style-type: none"><li>▪ Spiritual, psychological, and inspirational counseling</li><li>▪ Community outreach</li></ul> |
|--|---------------------------------------------------------------------------------------------------------------------------------------|

SOURCE Authors' analysis of study data
